# Supplementary material for: Kinetic Memory Based on the Enzyme-Limited Competition
Source: PubMed Central journal article supplement (PMC4133053; doi:10.1371/journal.pcbi.1003784), 2014-08-14
Supplement: pcbi.1003784.s008.pdf [file pcbi.1003784.s008.pdf]

## **Text S1.**

*Kinetic memory based on enzyme-limited competition*

Tetsuhiro S. Hatakeyama, Kunihiko Kaneko

# 1 Models and parameters

## 1.1 The chained modification model

In the simulation, we adopted the parameter values below unless otherwise noted.

|               |                                                  |
|---------------|--------------------------------------------------|
| $a_i$         | a(t)                                             |
| $b_i$         | 100.0 for all $i$                                |
| $N$           | 6                                                |
| $\gamma$      | 5.0                                              |
| $K_0$         | $0.1 \times 5.0^{-6} (= 0.1 \times \gamma^{-N})$ |
| $[S]_{total}$ | 1.0                                              |

Table 1: Parameter set of the chained modification model

We adopted the deterministic rate equation given by the mass-action kinetics, and it is simulated by using the fourth-order Runge-Kutta method.

## 1.2 The kinase-phosphatase model

In the simulation, we adopted the parameter values below.

|               |                  |
|---------------|------------------|
| $N$           | 2                |
| $a_i$         | 1.0 for all $i$  |
| $b_i$         | 10.0 for all $i$ |
| $\gamma$      | 10.0             |
| $K_0^K$       | 0.001            |
| $K_0^P$       | 0.0001           |
| $[S]_{total}$ | 1.0              |

Table 2: Parameter set of the kinase-phosphatase model

## 1.3 The extended Asakura-Honda model

The original Asakura-Honda (A-H) model was introduced to explain processes of adaptation to changes in the concentration of external signal molecules (attractant and repellent) during chemotactic behavior [1]. This model represents a two-state (S form and T form) receptor with multiple modification sites. The S and T form receptors are recognized by distinct enzymes, which catalyze an increase and a decrease in the number of modified sites, respectively. In the model, the enzymes are always maintained at sufficient levels so as to not be rate-limiting.  $[S_i]$  and  $[T_i]$  represent the concentration of the S and T forms of the receptor with  $i$  modified sites, respectively. When an external signal, such as a change in ligand concentration, is applied,  $L_i = [S_i]/[T_i]$ , the equilibrium

value of  $[S_i]$  to  $[T_i]$  is changed instantaneously. The equilibrium value of  $[S_i]/[T_i]$  in the absence of an external signal is denoted as  $L_i^0$ , and that in the presence of signal is denoted as  $L_i$ .  $L_i$  increases upon administration of an attractant and decreases upon administration of a repellent. As the number of modified sites  $i$  is increased, the receptors are assumed to take on the T form more often, such that  $L_i^0$  decreases with the number of modification sites  $i$ .

When the ligand concentration is changed, the total ratio  $S/T = \Sigma[S_i]/\Sigma[T_i]$  changes initially. As the ratio increases (decreases), the number of modified sites increases (decreases). Subsequently, the highly modified receptors again flip to the T (S) form; thus, in both cases, the  $S/T$  ratio ultimately returns to the original proportion; therefore the A-H model exhibits perfect adaptation. By denoting the rate  $S_{i-1} \rightarrow S_i$  as  $a_i$  and  $T_i \rightarrow T_{i-1}$  as  $b_i$ , the fixed point concentrations  $[T_i]^*$  and  $[S_i]^*$  satisfy  $-a_i[S_{i-1}]^* + b_i[T_i]^* = 0$  and  $\mu_i \equiv [T_i]^*/[S_{i-1}]^* = a_i/b_i$  for all  $i$ . Under perfect adaptation  $\mu_i = \mu(\text{const.})$  and  $L_0^0 \gg 1$  and  $L_N^0 \ll 1$ : In this condition,  $\mu = [T_1]^*/[S_0]^* = [T_2]^*/[T_1]^* = \dots = [T_N]^*/[S_{N-1}]^* = (T^* - [T_0]^*)/(S^* - [S_N]^*)$  and  $[T_0]^* \sim 0$ ,  $[S_N]^* \sim 0$ ; therefore,  $T^*/S^* \sim \mu$ . At this point, perfect adaptation is achieved.

We adopt the A-H model for our study because it is a classic model for adaptation in which several modification sites can be considered. Indeed, various extensions to this model have been introduced to cover a wide range of adaptation phenomena [2, 3]. Here, for the purpose of modeling a slower relaxation than the original A-H model, we extend the A-H model to also explicitly include the concentration of a cofactor as a conservation quantity. Our extended A-H model has a cofactor that facilitates all reactions by acting as a catalyst and enabling the addition or removal of a functional (e.g., phosphate or methyl) group.

In the simulation, we adopted the parameter values below, in the case of  $N = 6$ . Following the original implementation of the A-H model, we initially set the system at an attractant condition (high  $L_i$ ), in which the substrates were highly modified. We then exposed the system to a repellent condition (low  $L_i$ ). Under these conditions,  $T(= \Sigma[T_i])$ , the fraction of methylated proteins increased transiently and relaxed to the original value.

|               |                  |
|---------------|------------------|
| $a_i$         | 1.0 for all $i$  |
| $b_i$         | 10.0 for all $i$ |
| $L_0^0$       | $10^{5.5}$       |
| $L_1^0$       | $10^{1.5}$       |
| $L_2^0$       | $10^{1.0}$       |
| $L_3^0$       | $10^{0.5}$       |
| $L_4^0$       | $10^{0.0}$       |
| $L_5^0$       | $10^{-0.5}$      |
| $L_6^0$       | $10^{-4.5}$      |
| $[P]_{total}$ | 1.0              |

Table 3: Parameter set of the extended Asakura-Honda model

It is important to note that in our extended model, the steady state value of  $T$  is different from that in the original A-H model, where the stable fixed point value of  $T$  is  $T^* = \mu/(1 + \mu) = a/(a + b)$ . In the extended A-H model, however,  $\mu_i$  is changed to  $\mu'_i = \frac{a[C]_{free}/([C]_{free} + K_i^S)}{b[C]_{free}/([C]_{free} + K_i^T)}$ . Perfect adaptation requires that  $\mu'_i$  is independent of  $i$ . This is possible in the limit of  $[C]_{total} \rightarrow 0$  except in the case of  $[C]_{total} \rightarrow \infty$  (original A-H model). In the case of  $[C]_{total} \rightarrow 0$ ,  $\mu'_i \sim \frac{a/K_i^S - 1}{b/K_i^T}$ . If the dissociation constants  $K_i^S$  and  $K_i^T$  increase with an exponent  $\gamma i$ ,  $\mu'_i$  is independent of  $i$  as  $\mu' = a\gamma/b$ , and the extended A-H model shows perfect adaptation, with a change of the fixed-point value to  $T^* = \mu_i/(1 + \mu_i) = a\gamma/(a\gamma + b) = 1/3$ . Generally, the steady-state concentration depends on the increase rate of the binding energy of the catalyst-substrate complexes,  $\gamma$ , except in the case of  $\gamma = 1$ , where the steady state value is constant, independently of the concentration of the catalyst.

## References

1. Asakura S, & Honda H. (1984). Two-state model for bacterial chemoreceptor proteins. The role of multiple methylation. *J. Mol. Biol.* 176, 349–67.
2. Barkai N, & Leibler S. (1997). Robustness in simple biochemical networks. *Nature* 387, 913–7.
3. Rao CV, Kirby JR, & Arkin AP. (2004). Design and diversity in bacterial chemotaxis: a comparative study in *Escherichia coli* and *Bacillus subtilis*. *PLoS Biol.* 2, E49.
